# Supplementary material for: The Value of Pharmacogenomics for White and Indigenous Americans after Kidney Transplantation
Source: MDPI journal article supplement (doi:10.3390/pharmacy11040125), 2023-08-08
Supplement: s1 [file s1]

## Supplementary Information

**Table S1:**

Resources utilized by pharmacogenomic pharmacist to guide clinical recommendations

|                                                                     |                                                                                                                                                                                                                |
|---------------------------------------------------------------------|----------------------------------------------------------------------------------------------------------------------------------------------------------------------------------------------------------------|
| Clinical Pharmacogenetics Implementation Consortium (CPIC)          | <a href="https://cpicpgx.org/genes-drugs/">https://cpicpgx.org/genes-drugs/</a>                                                                                                                                |
| CPIC levels of evidence                                             | <a href="https://cpicpgx.org/prioritization/">https://cpicpgx.org/prioritization/</a>                                                                                                                          |
| Up to Date                                                          | <a href="http://www.uptodate.com">www.uptodate.com</a>                                                                                                                                                         |
| Pharmacogenomics Knowledgebase                                      | <a href="http://www.pharmgkb.org">www.pharmgkb.org</a>                                                                                                                                                         |
| Royal Dutch Pharmacists Association- Pharmacogenetics Working Group | <a href="https://www.pharmgkb.org/literature/7283333">https://www.pharmgkb.org/literature/7283333</a><br><a href="https://www.pharmgkb.org/literature/8564161">https://www.pharmgkb.org/literature/8564161</a> |
| OneOme RightMed Test                                                | <a href="https://oneome.com/rightmed-test/">https://oneome.com/rightmed-test/</a>                                                                                                                              |

**Table S2:** Allelic combinations that correlate with the phenotypes presented in Table 2

| Phenotype                       | Genotype |
|---------------------------------|----------|
| <b>CYP2C9 PHENOTYPE, n (%)</b>  |          |
| Normal                          | *1/*1    |
| Intermediate to normal          | *1/*2    |
| Intermediate                    | *1/*3    |
| Poor to intermediate            | *2/*3    |
| Poor                            | *3/*3    |
| <b>CYP2C19 PHENOTYPE, n (%)</b> |          |
| Normal                          | *1/*1    |
| Intermediate to normal          | *2/*17   |
| Intermediate                    | *1/*2    |
| Poor                            | *2/*2    |
| Rapid                           | *1/*17   |
| Ultrarapid                      | *17/*17  |
| <b>CYP2D6 PHENOTYPE, n (%)</b>  |          |
| Normal                          | *1/*2A   |
| Intermediate to normal          | *1/*41   |
| Intermediate                    | *2A/*4   |
| Poor to intermediate            | *13/*41  |
| Poor                            | *4/*4    |
| <b>CYP3A4 PHENOTYPE, n (%)</b>  |          |
| Normal                          | *1/*1    |
| Intermediate to normal          | *1/*22   |
| <b>CYP3A5 PHENOTYPE, n (%)</b>  |          |
| Intermediate                    | *1/*3    |
| Poor                            | *3/*3    |

|                                 |  |                    |
|---------------------------------|--|--------------------|
|                                 |  |                    |
|                                 |  |                    |
| <b>CYP4F2 PHENOTYPE, n (%)</b>  |  |                    |
| Normal                          |  | *1/*1              |
| Reduced                         |  | *1/*3              |
| <b>COMT PHENOTYPE, n (%)</b>    |  |                    |
| Low activity                    |  | rs4680 AA          |
| High activity                   |  | rs4680 GG          |
| Intermediate                    |  | rs4680 GA          |
| <b>NUDT15 PHENOTYPE, n (%)</b>  |  |                    |
| Normal                          |  | rs116855232 CC     |
| Increased risk                  |  | rs116855232 CT     |
| <b>SLC6A4 PHENOTYPE, n (%)</b>  |  |                    |
| Reduced                         |  | (Sa/Sa)            |
| Typical to reduced              |  | (La/Sa) or (La/Lg) |
| Typical To increased            |  | (La/La)            |
| <b>SLCO1B1 PHENOTYPE, n (%)</b> |  |                    |
| Normal                          |  | *1A/*1B            |
| Decreased activity              |  | *1A/*5             |
| Increased activity              |  | *1A/*15 or *1B/*5  |
| <b>TPMT PHENOTYPE, n (%)</b>    |  |                    |
| Normal                          |  | *1/*1              |
| Intermediate Metabolizer        |  | *1/*3C             |
| Increased                       |  | *1/*3A             |
| <b>VKORC1 PHENOTYPE, n (%)</b>  |  |                    |
| Normal                          |  | rs9923231 GG       |
| Low activity                    |  | rs9923231 AA       |
| Intermediate                    |  | rs9923231 GA       |

**Table S3:** Comparison of Survey Results for Patients Pre-transplant and Post-transplant

|                                                                                                                          | Post (N=42) | Pre (N=59) | Total (N=101) | p value              |
|--------------------------------------------------------------------------------------------------------------------------|-------------|------------|---------------|----------------------|
| <b>In general, would you say your health is:</b>                                                                         |             |            |               | 0.522 <sup>1</sup>   |
| N-Miss                                                                                                                   | 3           | 1          | 4             |                      |
| Excellent                                                                                                                | 4 (10.3%)   | 2 (3.4%)   | 6 (6.2%)      |                      |
| Fair                                                                                                                     | 5 (12.8%)   | 9 (15.5%)  | 14 (14.4%)    |                      |
| Good                                                                                                                     | 14 (35.9%)  | 28 (48.3%) | 42 (43.3%)    |                      |
| Poor                                                                                                                     | 2 (5.1%)    | 3 (5.2%)   | 5 (5.2%)      |                      |
| Very Good                                                                                                                | 14 (35.9%)  | 16 (27.6%) | 30 (30.9%)    |                      |
| <b>How important of a role do you think your genetics take in your kidney and transplant care?</b>                       |             |            |               | 0.580 <sup>1</sup>   |
| N-Miss                                                                                                                   | 1           | 1          | 2             |                      |
| Important                                                                                                                | 10 (24.4%)  | 18 (31.0%) | 28 (28.3%)    |                      |
| Neutral                                                                                                                  | 5 (12.2%)   | 7 (12.1%)  | 12 (12.1%)    |                      |
| Not Important                                                                                                            | 2 (4.9%)    | 3 (5.2%)   | 5 (5.1%)      |                      |
| Somewhat Important                                                                                                       | 5 (12.2%)   | 12 (20.7%) | 17 (17.2%)    |                      |
| Very Important                                                                                                           | 19 (46.3%)  | 18 (31.0%) | 37 (37.4%)    |                      |
| <b>How concerned are you that your test results might show that you need to switch to a different prescription drug?</b> |             |            |               | 0.901 <sup>1</sup>   |
| N-Miss                                                                                                                   | 6           | 3          | 9             |                      |
| Extremely Concerned                                                                                                      | 5 (13.9%)   | 9 (16.1%)  | 14 (15.2%)    |                      |
| Not At All Concerned                                                                                                     | 16 (44.4%)  | 24 (42.9%) | 40 (43.5%)    |                      |
| Quite Concerned                                                                                                          | 4 (11.1%)   | 9 (16.1%)  | 13 (14.1%)    |                      |
| Slightly Concerned                                                                                                       | 11 (30.6%)  | 14 (25.0%) | 25 (27.2%)    |                      |
| <b>Knowing how my body may respond to certain prescription drugs would bring me peace of mind</b>                        |             |            |               | < 0.001 <sup>1</sup> |
| N-Miss                                                                                                                   | 2           | 1          | 3             |                      |
| Agree                                                                                                                    | 25 (62.5%)  | 17 (29.3%) | 42 (42.9%)    |                      |
| Disagree                                                                                                                 | 1 (2.5%)    | 0 (0.0%)   | 1 (1.0%)      |                      |
| Neither Agree Or Disagree                                                                                                | 4 (10.0%)   | 2 (3.4%)   | 6 (6.1%)      |                      |
| Strongly Agree                                                                                                           | 10 (25.0%)  | 39 (67.2%) | 49 (50.0%)    |                      |
| <b>Knowing how my body may respond to certain prescription drugs would give me more control over my health</b>           |             |            |               | < 0.001 <sup>1</sup> |
| N-Miss                                                                                                                   | 2           | 2          | 4             |                      |
| Agree                                                                                                                    | 22 (55.0%)  | 17 (29.8%) | 39 (40.2%)    |                      |
| Disagree                                                                                                                 | 1 (2.5%)    | 0 (0.0%)   | 1 (1.0%)      |                      |
| Neither Agree Or Disagree                                                                                                | 6 (15.0%)   | 0 (0.0%)   | 6 (6.2%)      |                      |
| Strongly Agree                                                                                                           | 10 (25.0%)  | 40 (70.2%) | 50 (51.5%)    |                      |
| Strongly Disagree                                                                                                        | 1 (2.5%)    | 0 (0.0%)   | 1 (1.0%)      |                      |
| <b>Knowing how my body may respond to certain prescription drugs would be useful to me immediately</b>                   |             |            |               | < 0.001 <sup>1</sup> |
| N-Miss                                                                                                                   | 3           | 2          | 5             |                      |
| Agree                                                                                                                    | 26 (66.7%)  | 16 (28.1%) | 42 (43.8%)    |                      |
| Disagree                                                                                                                 | 1 (2.6%)    | 0 (0.0%)   | 1 (1.0%)      |                      |
| Neither Agree Or Disagree                                                                                                | 6 (15.4%)   | 5 (8.8%)   | 11 (11.5%)    |                      |
| Strongly Agree                                                                                                           | 6 (15.4%)   | 36 (63.2%) | 42 (43.8%)    |                      |
| <b>Knowing how my body may respond to certain prescription drugs would be useful to me in the future</b>                 |             |            |               | 0.029 <sup>1</sup>   |
| N-Miss                                                                                                                   | 2           | 2          | 4             |                      |
| Agree                                                                                                                    | 22 (55.0%)  | 18 (31.6%) | 40 (41.2%)    |                      |

Neither Agree Or Disagree  
Strongly Agree

3 (7.5%) 2 (3.5%) 5 (5.2%)  
15 (37.5%) 37 (64.9%) 52 (53.6%)

# 1. Fisher's Exact Test for Count Data

**Table S4:** Comparison of Responses to Post-transplant Survey by Observed Drug-Gene Interactions

|                                                                                                                 | Clinically Actionable (N=5) | Minimal (N=7) | None (N=28) | Total (N=40) | p value            |
|-----------------------------------------------------------------------------------------------------------------|-----------------------------|---------------|-------------|--------------|--------------------|
| <b>In general, would you say your health is:</b>                                                                |                             |               |             |              | 0.546 <sup>1</sup> |
| N-Miss                                                                                                          | 0                           | 2             | 1           | 3            |                    |
| Excellent                                                                                                       | 0 (0.0%)                    | 0 (0.0%)      | 3 (11.1%)   | 3 (8.1%)     |                    |
| Fair                                                                                                            | 2 (40.0%)                   | 0 (0.0%)      | 3 (11.1%)   | 5 (13.5%)    |                    |
| Good                                                                                                            | 2 (40.0%)                   | 1 (20.0%)     | 11 (40.7%)  | 14 (37.8%)   |                    |
| Poor                                                                                                            | 0 (0.0%)                    | 0 (0.0%)      | 1 (3.7%)    | 1 (2.7%)     |                    |
| Very Good                                                                                                       | 1 (20.0%)                   | 4 (80.0%)     | 9 (33.3%)   | 14 (37.8%)   |                    |
| <b>How important of a role do you think your genetics take in your kidney and transplant care?</b>              |                             |               |             |              | 0.394 <sup>1</sup> |
| N-Miss                                                                                                          | 0                           | 1             | 0           | 1            |                    |
| Important                                                                                                       | 2 (40.0%)                   | 1 (16.7%)     | 6 (21.4%)   | 9 (23.1%)    |                    |
| Neutral                                                                                                         | 0 (0.0%)                    | 0 (0.0%)      | 5 (17.9%)   | 5 (12.8%)    |                    |
| Not Important                                                                                                   | 0 (0.0%)                    | 0 (0.0%)      | 2 (7.1%)    | 2 (5.1%)     |                    |
| Somewhat Important                                                                                              | 2 (40.0%)                   | 0 (0.0%)      | 3 (10.7%)   | 5 (12.8%)    |                    |
| Very Important                                                                                                  | 1 (20.0%)                   | 5 (83.3%)     | 12 (42.9%)  | 18 (46.2%)   |                    |
| <b>I have had a discussion with my primary care provider regarding my pharmacogenomics test results</b>         |                             |               |             |              | 0.382 <sup>1</sup> |
| N-Miss                                                                                                          | 0                           | 0             | 1           | 1            |                    |
| Don't Know                                                                                                      | 2 (40.0%)                   | 1 (14.3%)     | 3 (11.1%)   | 6 (15.4%)    |                    |
| No                                                                                                              | 3 (60.0%)                   | 4 (57.1%)     | 20 (74.1%)  | 27 (69.2%)   |                    |
| Yes                                                                                                             | 0 (0.0%)                    | 2 (28.6%)     | 4 (14.8%)   | 6 (15.4%)    |                    |
| <b>I have had a discussion with my kidney transplant provider regarding my pharmacogenomics test results</b>    |                             |               |             |              | 0.460 <sup>1</sup> |
| N-Miss                                                                                                          | 0                           | 0             | 1           | 1            |                    |
| Don't Know                                                                                                      | 0 (0.0%)                    | 1 (14.3%)     | 3 (11.1%)   | 4 (10.3%)    |                    |
| No                                                                                                              | 3 (60.0%)                   | 3 (42.9%)     | 19 (70.4%)  | 25 (64.1%)   |                    |
| Yes                                                                                                             | 2 (40.0%)                   | 3 (42.9%)     | 5 (18.5%)   | 10 (25.6%)   |                    |
| <b>If you answered yes to #3 OR #4, were there any changes made to any of your prescriptions?</b>               |                             |               |             |              | 0.009 <sup>1</sup> |
| N-Miss                                                                                                          | 3                           | 3             | 20          | 26           |                    |
| Don't Know                                                                                                      | 1 (50.0%)                   | 0 (0.0%)      | 0 (0.0%)    | 1 (7.1%)     |                    |
| No                                                                                                              | 1 (50.0%)                   | 0 (0.0%)      | 6 (75.0%)   | 7 (50.0%)    |                    |
| Yes                                                                                                             | 0 (0.0%)                    | 4 (100.0%)    | 2 (25.0%)   | 6 (42.9%)    |                    |
| <b>If changes were made to your medications, how satisfied are you with these changes?</b>                      |                             |               |             |              | 0.643 <sup>1</sup> |
| N-Miss                                                                                                          | 3                           | 3             | 19          | 25           |                    |
| Extremely Dissatisfied                                                                                          | 0 (0.0%)                    | 0 (0.0%)      | 1 (11.1%)   | 1 (6.7%)     |                    |
| Extremely Satisfied                                                                                             | 0 (0.0%)                    | 1 (25.0%)     | 4 (44.4%)   | 5 (33.3%)    |                    |
| Satisfied                                                                                                       | 0 (0.0%)                    | 2 (50.0%)     | 2 (22.2%)   | 4 (26.7%)    |                    |
| Very Satisfied                                                                                                  | 2 (100.0%)                  | 1 (25.0%)     | 2 (22.2%)   | 5 (33.3%)    |                    |
| <b>If you have reviewed study results, how concerned are you that your results may indicate that you need a</b> |                             |               |             |              | 1.000 <sup>1</sup> |

**different dose of a prescription drug you are currently taking?**

| N-Miss               | 1         | 1         | 5          | 7          |
|----------------------|-----------|-----------|------------|------------|
| Extremely Concerned  | 0 (0.0%)  | 1 (16.7%) | 3 (13.0%)  | 4 (12.1%)  |
| Not At All Concerned | 2 (50.0%) | 3 (50.0%) | 10 (43.5%) | 15 (45.5%) |
| Quite Concerned      | 0 (0.0%)  | 0 (0.0%)  | 1 (4.3%)   | 1 (3.0%)   |
| Slightly Concerned   | 2 (50.0%) | 2 (33.3%) | 9 (39.1%)  | 13 (39.4%) |

**How concerned are you that your test results might show that you need to switch to a different prescription drug?**

0.861<sup>1</sup>

| N-Miss               | 0         | 1         | 5         | 6          |
|----------------------|-----------|-----------|-----------|------------|
| Extremely Concerned  | 0 (0.0%)  | 1 (16.7%) | 3 (13.0%) | 4 (11.8%)  |
| Not At All Concerned | 2 (40.0%) | 4 (66.7%) | 9 (39.1%) | 15 (44.1%) |
| Quite Concerned      | 1 (20.0%) | 0 (0.0%)  | 3 (13.0%) | 4 (11.8%)  |
| Slightly Concerned   | 2 (40.0%) | 1 (16.7%) | 8 (34.8%) | 11 (32.4%) |

**Knowing how my body may respond to certain prescription drugs would bring me peace of mind**

0.198<sup>1</sup>

| N-Miss                    | 0         | 1         | 1          | 2          |
|---------------------------|-----------|-----------|------------|------------|
| Agree                     | 3 (60.0%) | 2 (33.3%) | 19 (70.4%) | 24 (63.2%) |
| Disagree                  | 0 (0.0%)  | 0 (0.0%)  | 1 (3.7%)   | 1 (2.6%)   |
| Neither Agree Or Disagree | 0 (0.0%)  | 0 (0.0%)  | 3 (11.1%)  | 3 (7.9%)   |
| Strongly Agree            | 2 (40.0%) | 4 (66.7%) | 4 (14.8%)  | 10 (26.3%) |

**Knowing how my body may respond to certain prescription drugs would be useful to me immediately**

0.546<sup>1</sup>

| N-Miss                    | 0         | 1         | 2          | 3          |
|---------------------------|-----------|-----------|------------|------------|
| Agree                     | 2 (40.0%) | 5 (83.3%) | 18 (69.2%) | 25 (67.6%) |
| Disagree                  | 0 (0.0%)  | 0 (0.0%)  | 1 (3.8%)   | 1 (2.7%)   |
| Neither Agree Or Disagree | 1 (20.0%) | 1 (16.7%) | 4 (15.4%)  | 6 (16.2%)  |
| Strongly Agree            | 2 (40.0%) | 0 (0.0%)  | 3 (11.5%)  | 5 (13.5%)  |

**Knowing how my body may respond to certain prescription drugs would give me more control over my health**

0.457<sup>1</sup>

| N-Miss                    | 0         | 1         | 1          | 2          |
|---------------------------|-----------|-----------|------------|------------|
| Agree                     | 1 (20.0%) | 3 (50.0%) | 17 (63.0%) | 21 (55.3%) |
| Disagree                  | 0 (0.0%)  | 0 (0.0%)  | 1 (3.7%)   | 1 (2.6%)   |
| Neither Agree Or Disagree | 1 (20.0%) | 1 (16.7%) | 4 (14.8%)  | 6 (15.8%)  |
| Strongly Agree            | 3 (60.0%) | 2 (33.3%) | 4 (14.8%)  | 9 (23.7%)  |
| Strongly Disagree         | 0 (0.0%)  | 0 (0.0%)  | 1 (3.7%)   | 1 (2.6%)   |

**Knowing how my body may respond to certain prescription drugs would be useful to me in the future**

0.118<sup>1</sup>

| N-Miss                    | 0         | 1         | 1          | 2          |
|---------------------------|-----------|-----------|------------|------------|
| Agree                     | 2 (40.0%) | 1 (16.7%) | 18 (66.7%) | 21 (55.3%) |
| Neither Agree Or Disagree | 0 (0.0%)  | 1 (16.7%) | 2 (7.4%)   | 3 (7.9%)   |
| Strongly Agree            | 3 (60.0%) | 4 (66.7%) | 7 (25.9%)  | 14 (36.8%) |

**How valuable are your pharmacogenomics results?**

0.963<sup>1</sup>

| N-Miss              | 0         | 1         | 2          | 3          |
|---------------------|-----------|-----------|------------|------------|
| Extremely Valuable  | 1 (20.0%) | 1 (16.7%) | 5 (19.2%)  | 7 (18.9%)  |
| Not At All Valuable | 0 (0.0%)  | 0 (0.0%)  | 1 (3.8%)   | 1 (2.7%)   |
| Quite Valuable      | 3 (60.0%) | 2 (33.3%) | 12 (46.2%) | 17 (45.9%) |
| Slightly Valuable   | 1 (20.0%) | 3 (50.0%) | 8 (30.8%)  | 12 (32.4%) |

**Would you recommend you friends or family to have pharmacogenomics testing?**

0.161<sup>1</sup>

|            |           |            |            |            |
|------------|-----------|------------|------------|------------|
| N-Miss     | 0         | 0          | 1          | 1          |
| Don't Know | 3 (60.0%) | 0 (0.0%)   | 6 (22.2%)  | 9 (23.1%)  |
| No         | 0 (0.0%)  | 0 (0.0%)   | 2 (7.4%)   | 2 (5.1%)   |
| Yes        | 2 (40.0%) | 7 (100.0%) | 19 (70.4%) | 28 (71.8%) |

1. Fisher's Exact Test for Count Data

**Table S5:** Comparison Responses to the Post-transplant Survey by Medication Recommendations

|                                                                                                              | Continue With<br>Current Dosing<br>(N=28) | Dose<br>Adjustment<br>(N=6) | Use Caution<br>(N=6) | Total<br>(N=40) | p value            |
|--------------------------------------------------------------------------------------------------------------|-------------------------------------------|-----------------------------|----------------------|-----------------|--------------------|
| <b>In general, would you say your health is:</b>                                                             |                                           |                             |                      |                 | 0.761 <sup>1</sup> |
| N-Miss                                                                                                       | 1                                         | 0                           | 2                    | 3               |                    |
| Excellent                                                                                                    | 3 (11.1%)                                 | 0 (0.0%)                    | 0 (0.0%)             | 3 (8.1%)        |                    |
| Fair                                                                                                         | 3 (11.1%)                                 | 2 (33.3%)                   | 0 (0.0%)             | 5 (13.5%)       |                    |
| Good                                                                                                         | 11 (40.7%)                                | 2 (33.3%)                   | 1 (25.0%)            | 14 (37.8%)      |                    |
| Poor                                                                                                         | 1 (3.7%)                                  | 0 (0.0%)                    | 0 (0.0%)             | 1 (2.7%)        |                    |
| Very Good                                                                                                    | 9 (33.3%)                                 | 2 (33.3%)                   | 3 (75.0%)            | 14 (37.8%)      |                    |
| <b>How important of a role do you think your genetics take in your kidney and transplant care?</b>           |                                           |                             |                      |                 | 0.724 <sup>1</sup> |
| N-Miss                                                                                                       | 0                                         | 0                           | 1                    | 1               |                    |
| Important                                                                                                    | 6 (21.4%)                                 | 2 (33.3%)                   | 1 (20.0%)            | 9 (23.1%)       |                    |
| Neutral                                                                                                      | 5 (17.9%)                                 | 0 (0.0%)                    | 0 (0.0%)             | 5 (12.8%)       |                    |
| Not Important                                                                                                | 2 (7.1%)                                  | 0 (0.0%)                    | 0 (0.0%)             | 2 (5.1%)        |                    |
| Somewhat Important                                                                                           | 3 (10.7%)                                 | 2 (33.3%)                   | 0 (0.0%)             | 5 (12.8%)       |                    |
| Very Important                                                                                               | 12 (42.9%)                                | 2 (33.3%)                   | 4 (80.0%)            | 18 (46.2%)      |                    |
| <b>I have had a discussion with my primary care provider regarding my pharmacogenomics test results</b>      |                                           |                             |                      |                 | 0.299 <sup>1</sup> |
| N-Miss                                                                                                       | 1                                         | 0                           | 0                    | 1               |                    |
| Don't Know                                                                                                   | 3 (11.1%)                                 | 2 (33.3%)                   | 1 (16.7%)            | 6 (15.4%)       |                    |
| No                                                                                                           | 20 (74.1%)                                | 4 (66.7%)                   | 3 (50.0%)            | 27 (69.2%)      |                    |
| Yes                                                                                                          | 4 (14.8%)                                 | 0 (0.0%)                    | 2 (33.3%)            | 6 (15.4%)       |                    |
| <b>I have had a discussion with my kidney transplant provider regarding my pharmacogenomics test results</b> |                                           |                             |                      |                 | 0.489 <sup>1</sup> |
| N-Miss                                                                                                       | 1                                         | 0                           | 0                    | 1               |                    |
| Don't Know                                                                                                   | 3 (11.1%)                                 | 1 (16.7%)                   | 0 (0.0%)             | 4 (10.3%)       |                    |
| No                                                                                                           | 19 (70.4%)                                | 3 (50.0%)                   | 3 (50.0%)            | 25 (64.1%)      |                    |
| Yes                                                                                                          | 5 (18.5%)                                 | 2 (33.3%)                   | 3 (50.0%)            | 10 (25.6%)      |                    |
| <b>If you answered yes to #3 OR #4, were there any changes made to any of your prescriptions?</b>            |                                           |                             |                      |                 | 0.009 <sup>1</sup> |
| N-Miss                                                                                                       | 20                                        | 4                           | 2                    | 26              |                    |
| Don't Know                                                                                                   | 0 (0.0%)                                  | 1 (50.0%)                   | 0 (0.0%)             | 1 (7.1%)        |                    |
| No                                                                                                           | 6 (75.0%)                                 | 1 (50.0%)                   | 0 (0.0%)             | 7 (50.0%)       |                    |
| Yes                                                                                                          | 2 (25.0%)                                 | 0 (0.0%)                    | 4 (100.0%)           | 6 (42.9%)       |                    |
| <b>If changes were made to your medications, how satisfied are you with these changes?</b>                   |                                           |                             |                      |                 | 0.643 <sup>1</sup> |

|                                                                                                                                                                                 |            |            |           |            |                    |
|---------------------------------------------------------------------------------------------------------------------------------------------------------------------------------|------------|------------|-----------|------------|--------------------|
| N-Miss                                                                                                                                                                          | 19         | 4          | 2         | 25         |                    |
| Extremely Dissatisfied                                                                                                                                                          | 1 (11.1%)  | 0 (0.0%)   | 0 (0.0%)  | 1 (6.7%)   |                    |
| Extremely Satisfied                                                                                                                                                             | 4 (44.4%)  | 0 (0.0%)   | 1 (25.0%) | 5 (33.3%)  |                    |
| Satisfied                                                                                                                                                                       | 2 (22.2%)  | 0 (0.0%)   | 2 (50.0%) | 4 (26.7%)  |                    |
| Very Satisfied                                                                                                                                                                  | 2 (22.2%)  | 2 (100.0%) | 1 (25.0%) | 5 (33.3%)  |                    |
| <b>If you have reviewed study results, how concerned are you that your results may indicate that you need a different dose of a prescription drug you are currently taking?</b> |            |            |           |            | 1.000 <sup>1</sup> |
| N-Miss                                                                                                                                                                          | 5          | 1          | 1         | 7          |                    |
| Extremely Concerned                                                                                                                                                             | 3 (13.0%)  | 0 (0.0%)   | 1 (20.0%) | 4 (12.1%)  |                    |
| Not At All Concerned                                                                                                                                                            | 10 (43.5%) | 3 (60.0%)  | 2 (40.0%) | 15 (45.5%) |                    |
| Quite Concerned                                                                                                                                                                 | 1 (4.3%)   | 0 (0.0%)   | 0 (0.0%)  | 1 (3.0%)   |                    |
| Slightly Concerned                                                                                                                                                              | 9 (39.1%)  | 2 (40.0%)  | 2 (40.0%) | 13 (39.4%) |                    |
| <b>How concerned are you that your test results might show that you need to switch to a different prescription drug?</b>                                                        |            |            |           |            | 0.978 <sup>1</sup> |
| N-Miss                                                                                                                                                                          | 5          | 0          | 1         | 6          |                    |
| Extremely Concerned                                                                                                                                                             | 3 (13.0%)  | 0 (0.0%)   | 1 (20.0%) | 4 (11.8%)  |                    |
| Not At All Concerned                                                                                                                                                            | 9 (39.1%)  | 3 (50.0%)  | 3 (60.0%) | 15 (44.1%) |                    |
| Quite Concerned                                                                                                                                                                 | 3 (13.0%)  | 1 (16.7%)  | 0 (0.0%)  | 4 (11.8%)  |                    |
| Slightly Concerned                                                                                                                                                              | 8 (34.8%)  | 2 (33.3%)  | 1 (20.0%) | 11 (32.4%) |                    |
| <b>Knowing how my body may respond to certain prescription drugs would bring me peace of mind</b>                                                                               |            |            |           |            | 0.275 <sup>1</sup> |
| N-Miss                                                                                                                                                                          | 1          | 0          | 1         | 2          |                    |
| Agree                                                                                                                                                                           | 19 (70.4%) | 3 (50.0%)  | 2 (40.0%) | 24 (63.2%) |                    |
| Disagree                                                                                                                                                                        | 1 (3.7%)   | 0 (0.0%)   | 0 (0.0%)  | 1 (2.6%)   |                    |
| Neither Agree Or Disagree                                                                                                                                                       | 3 (11.1%)  | 0 (0.0%)   | 0 (0.0%)  | 3 (7.9%)   |                    |
| Strongly Agree                                                                                                                                                                  | 4 (14.8%)  | 3 (50.0%)  | 3 (60.0%) | 10 (26.3%) |                    |
| <b>Knowing how my body may respond to certain prescription drugs would be useful to me immediately</b>                                                                          |            |            |           |            | 0.763 <sup>1</sup> |
| N-Miss                                                                                                                                                                          | 2          | 0          | 1         | 3          |                    |
| Agree                                                                                                                                                                           | 18 (69.2%) | 3 (50.0%)  | 4 (80.0%) | 25 (67.6%) |                    |
| Disagree                                                                                                                                                                        | 1 (3.8%)   | 0 (0.0%)   | 0 (0.0%)  | 1 (2.7%)   |                    |
| Neither Agree Or Disagree                                                                                                                                                       | 4 (15.4%)  | 1 (16.7%)  | 1 (20.0%) | 6 (16.2%)  |                    |
| Strongly Agree                                                                                                                                                                  | 3 (11.5%)  | 2 (33.3%)  | 0 (0.0%)  | 5 (13.5%)  |                    |
| <b>Knowing how my body may respond to certain prescription drugs would give me more control over my health</b>                                                                  |            |            |           |            | 0.570 <sup>1</sup> |
| N-Miss                                                                                                                                                                          | 1          | 0          | 1         | 2          |                    |
| Agree                                                                                                                                                                           | 17 (63.0%) | 2 (33.3%)  | 2 (40.0%) | 21 (55.3%) |                    |
| Disagree                                                                                                                                                                        | 1 (3.7%)   | 0 (0.0%)   | 0 (0.0%)  | 1 (2.6%)   |                    |
| Neither Agree Or Disagree                                                                                                                                                       | 4 (14.8%)  | 1 (16.7%)  | 1 (20.0%) | 6 (15.8%)  |                    |
| Strongly Agree                                                                                                                                                                  | 4 (14.8%)  | 3 (50.0%)  | 2 (40.0%) | 9 (23.7%)  |                    |
| Strongly Disagree                                                                                                                                                               | 1 (3.7%)   | 0 (0.0%)   | 0 (0.0%)  | 1 (2.6%)   |                    |
| <b>Knowing how my body may respond to certain prescription drugs would be useful to me in the future</b>                                                                        |            |            |           |            | 0.118 <sup>1</sup> |
| N-Miss                                                                                                                                                                          | 1          | 0          | 1         | 2          |                    |
| Agree                                                                                                                                                                           | 18 (66.7%) | 2 (33.3%)  | 1 (20.0%) | 21 (55.3%) |                    |

|                                                                                    |            |           |            |            |                    |
|------------------------------------------------------------------------------------|------------|-----------|------------|------------|--------------------|
| Neither Agree Or Disagree                                                          | 2 (7.4%)   | 0 (0.0%)  | 1 (20.0%)  | 3 (7.9%)   |                    |
| Strongly Agree                                                                     | 7 (25.9%)  | 4 (66.7%) | 3 (60.0%)  | 14 (36.8%) |                    |
| <b>How valuable are your pharmacogenomics results?</b>                             |            |           |            |            | 1.000 <sup>1</sup> |
| N-Miss                                                                             | 2          | 0         | 1          | 3          |                    |
| Extremely Valuable                                                                 | 5 (19.2%)  | 1 (16.7%) | 1 (20.0%)  | 7 (18.9%)  |                    |
| Not At All Valuable                                                                | 1 (3.8%)   | 0 (0.0%)  | 0 (0.0%)   | 1 (2.7%)   |                    |
| Quite Valuable                                                                     | 12 (46.2%) | 3 (50.0%) | 2 (40.0%)  | 17 (45.9%) |                    |
| Slightly Valuable                                                                  | 8 (30.8%)  | 2 (33.3%) | 2 (40.0%)  | 12 (32.4%) |                    |
| <b>Would you recommend you friends or family to have pharmacogenomics testing?</b> |            |           |            |            | 0.277 <sup>1</sup> |
| N-Miss                                                                             | 1          | 0         | 0          | 1          |                    |
| Don't Know                                                                         | 6 (22.2%)  | 3 (50.0%) | 0 (0.0%)   | 9 (23.1%)  |                    |
| No                                                                                 | 2 (7.4%)   | 0 (0.0%)  | 0 (0.0%)   | 2 (5.1%)   |                    |
| Yes                                                                                | 19 (70.4%) | 3 (50.0%) | 6 (100.0%) | 28 (71.8%) |                    |

1.Fisher's Exact Test for Count Data
